# Supplementary material for: Sorption comparison of two indium–organic framework isomers with syn–anti configurations
Source: Royal Society of Chemistry journal article supplement (doi:10.1039/c4ce00712c), 2014-05-09
Supplement: c4ce00712c1.pdf [file c4ce00712c1.pdf]

## SUPPORTING INFORMATION

### Sorption comparison of two indium-organic framework isomers with *syn/anti* configurations

Jinjie Qian,<sup>a,b</sup> Feilong Jiang,<sup>a</sup> Kongzhao Su,<sup>a,b</sup> Qipeng Li,<sup>a,b</sup> Kang Zhou,<sup>a,b</sup> Mingyan Wu,<sup>a</sup> Daqiang Yuan<sup>a</sup> and Maochun Hong<sup>\*a</sup>

<sup>a</sup>State Key Laboratory of Structure Chemistry, State Key Laboratory of Structure Chemistry, Fujian Institute of Research on the Structure of Matter, Chinese Academy of Sciences, Fuzhou, Fujian, 350002, China

<sup>b</sup>University of Chinese Academy of Sciences, Beijing, 100049, China

\*To whom correspondence should be addressed: E-mail: [hmc@fjirsm.ac.cn](mailto:hmc@fjirsm.ac.cn); Fax: +86-591-83794946; Tel: +86-591-83792460

#### Table of Content

|                                                    |       |
|----------------------------------------------------|-------|
| S1. Crystal Data                                   | S0    |
| S2. Additional X-ray Crystal Structural Figure     | S1-S2 |
| S3. Topological Analysis                           | S3    |
| S4. PXRD and TGA data                              | S4    |
| S5. Sorption Isotherms and Pore Size Distributions | S5-S6 |
| S6. References                                     | S6    |

#### S1. Crystal Data

**Table S1. Summary of Crystal Data and Refinement Results**

| Name   | Formula                                                    | Space group                | <i>a/b</i> (Å)        | <i>c</i> (Å) | $\alpha/\gamma$ (°) | $\theta$ (°) | <i>R(F)</i> |
|--------|------------------------------------------------------------|----------------------------|-----------------------|--------------|---------------------|--------------|-------------|
| InOF-3 | [Me <sub>2</sub> NH <sub>2</sub> ][In(BPDC) <sub>2</sub> ] | <i>P</i> 2 <sub>1</sub> /n | 14.0612(2)/16.1146(2) | 15.5087(2)   | 90                  | 103.831(2)   | 0.0360      |
| InOF-4 | [MeNH <sub>3</sub> ][In(BPDC) <sub>2</sub> ]               | <i>P</i> -42c              | 10.74540(10)          | 14.4927(6)   | 90                  | 90           | 0.0511      |

InOF denotes Indium-Organic Framework; BPDC = Biphenyl-3,3'-dicarboxylic acid; More details see CIF files.

## S2. Additional X-ray Crystal Structural Figures

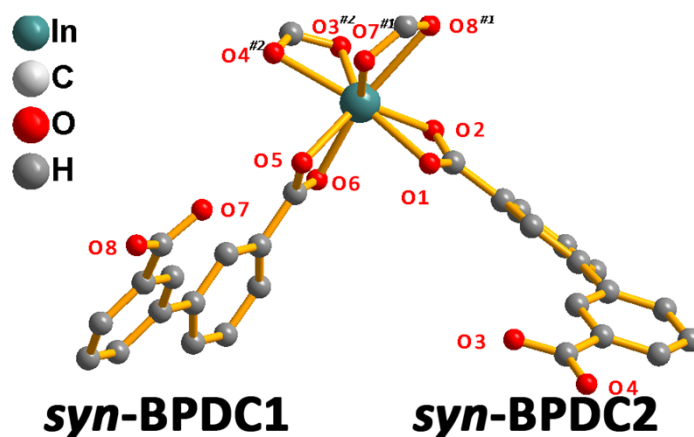

Figure S1. Asymmetric unit of InOF-3.

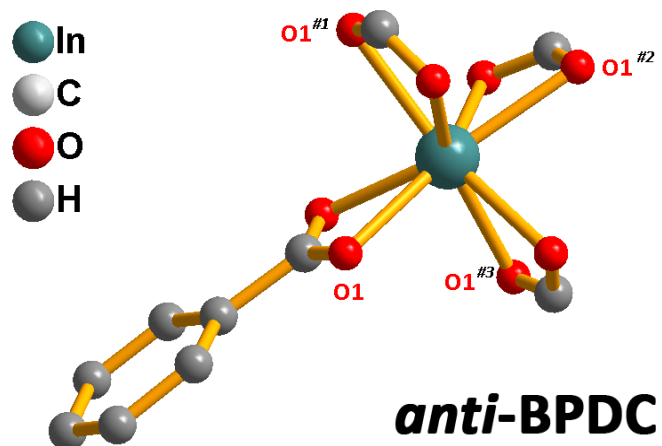

Figure S2. Asymmetric unit of InOF-4.

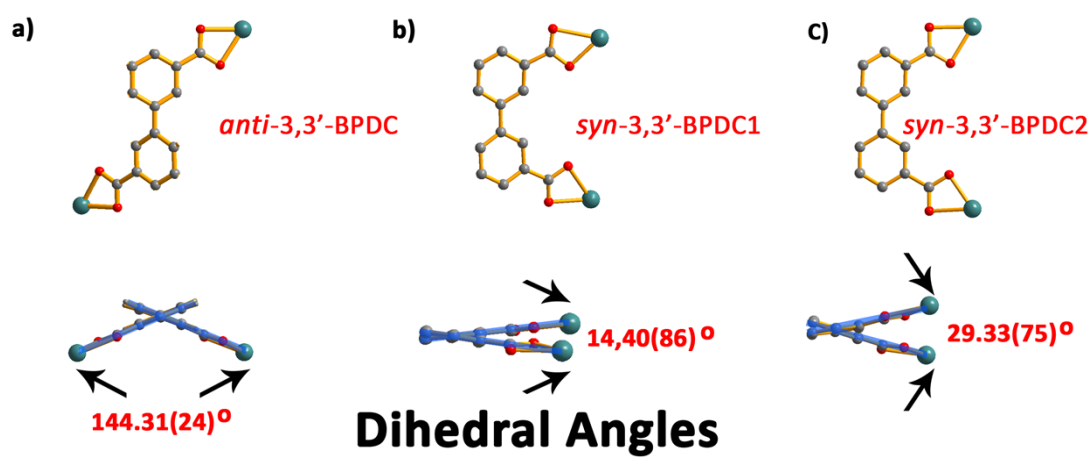

Figure S3. Summary of dihedral angles of BPDC ligands in InOF-3 (a) and InOF-4 (b, c).

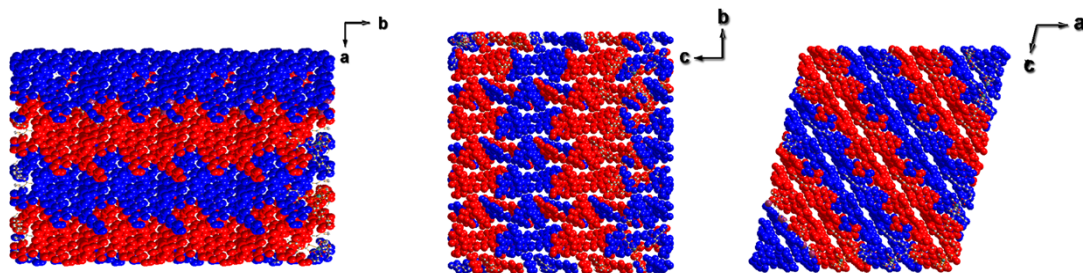

**Figure S4.** Models of 2D close-stacking layer-by-layer **InOF-3**.

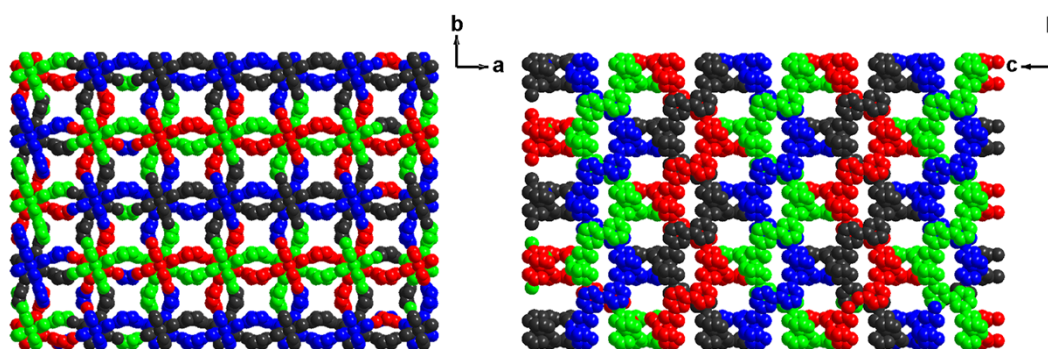

**Figure S5.** Models of 3D 4-fold microporous **InOF-4**.

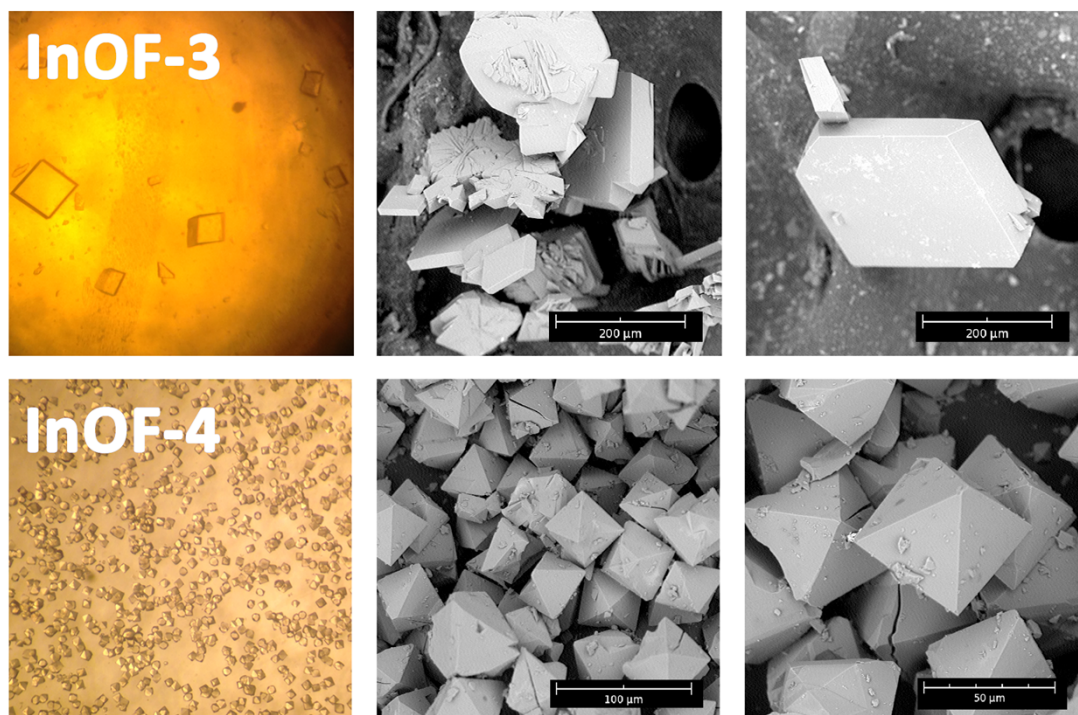

**Figure S6.** Photographs of the as-obtained **InOF-3** (up) and **InOF-4** (down).

### S3. Topological Analysis

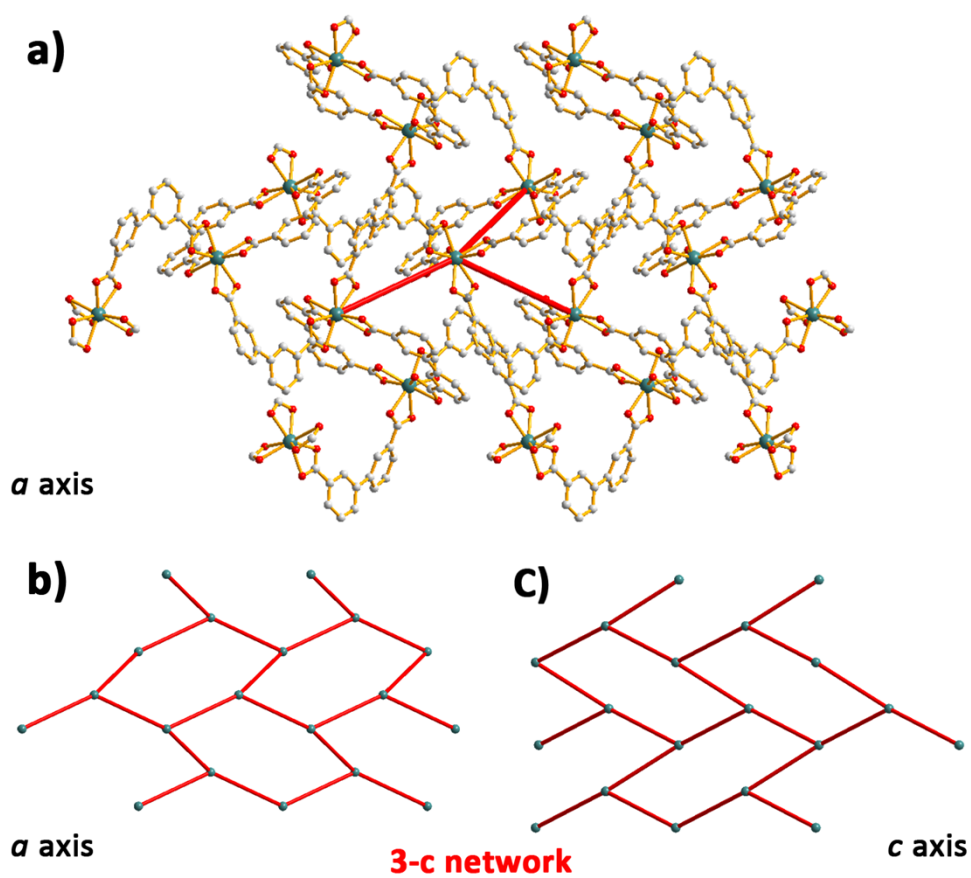

Figure S7. Single layer of InOF-3 and its topological figures.

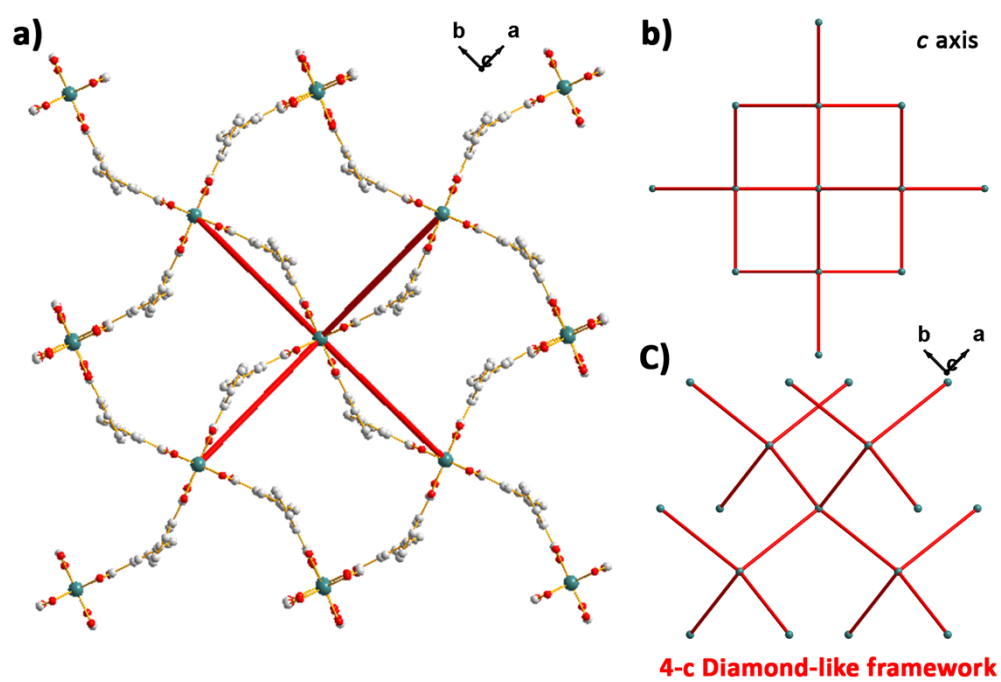

Figure S8. Single network of InOF-4 and its topological figures.

#### S4. TGA data and PXRD patterns

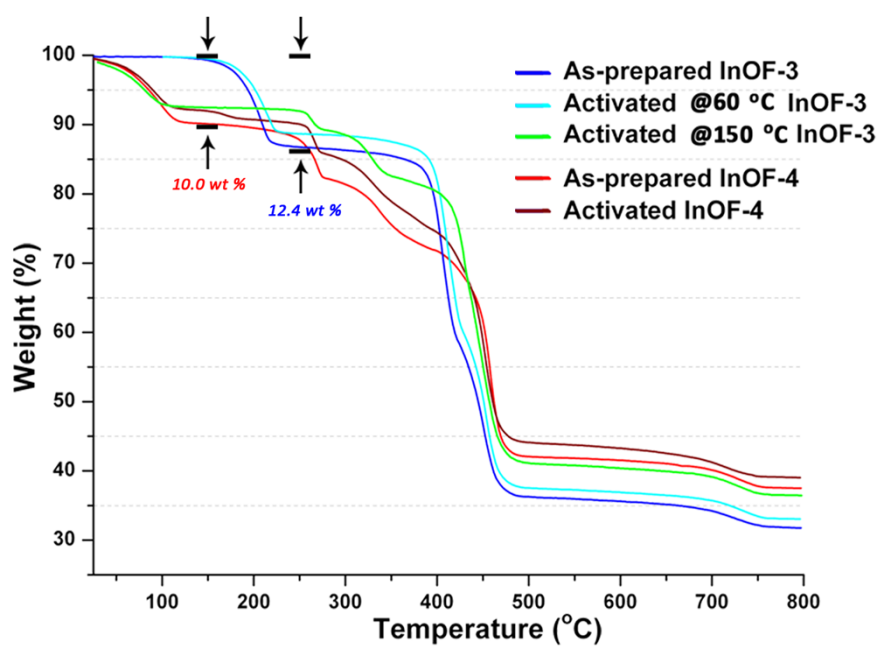

Figure S9. TGA curves for InOF-3 and InOF-4 before and after activation process.

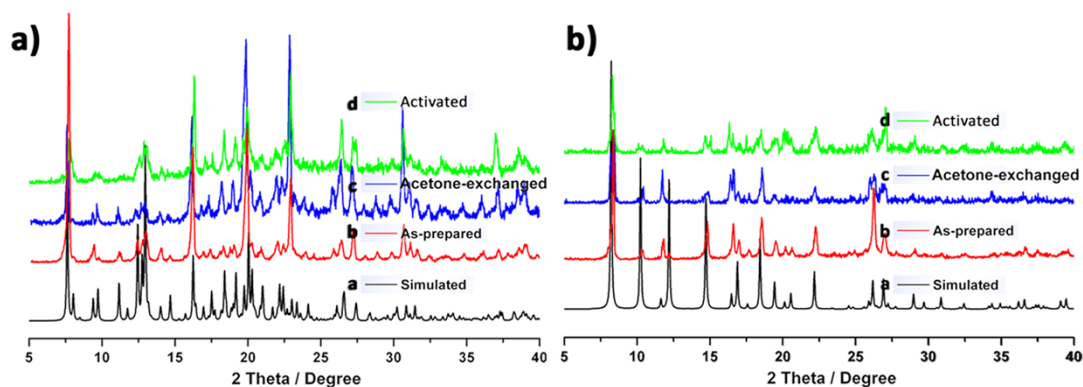

Figure S10. PXRD patterns for InOF-3 (a) and InOF-4 (b).

## S5 Sorption Isotherms and Pore Size Distributions

**$N_2$ ,  $H_2$  and  $CO_2$  Isotherms.** All the  $N_2$ ,  $H_2$  and  $CO_2$  isotherms for **InOF-3** and **InOF-4** were determined using an IGA gravimetric adsorption apparatus at the Fujian Institute of Research on the Structure of Matter in a clean ultra high vacuum system. Before measurements, about 100 mg acetone-exchanged samples were loaded into the sample basket within the adsorption instrument (ASAP 2020) and then degassed under dynamic vacuum for 10 h to obtain the fully desolvated samples.

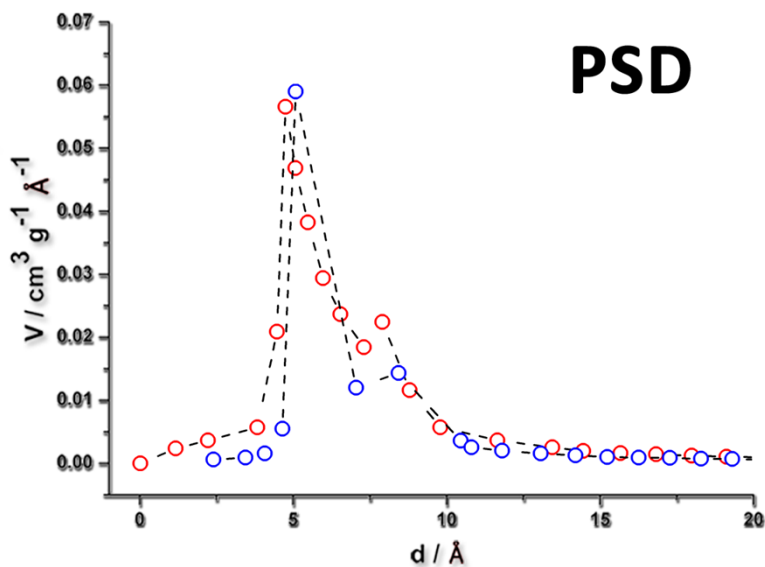

**Figure S11.** The pore size distribution incremental pore volume (V) vs. pore width (d) conducted by Horvath-Kawazoe method.

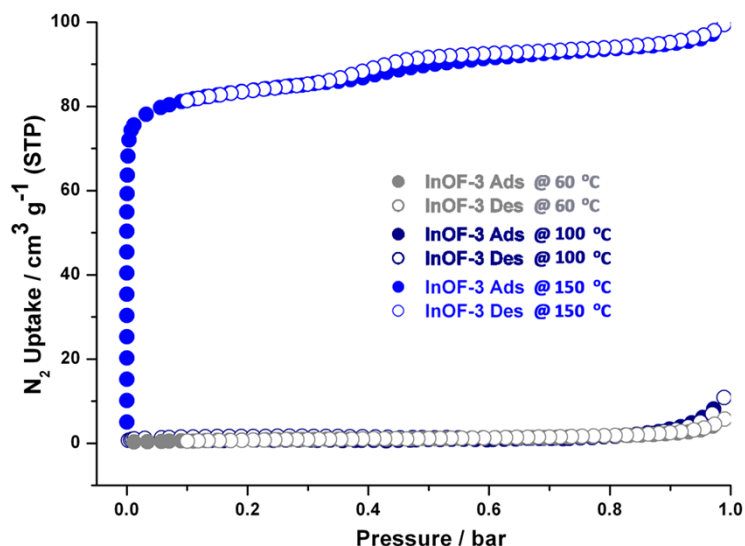

**Figure S12.**  $N_2$  isotherms at 77 K for **InOF-3** samples activated at different temperature (60 °C, 100 °C, 150 °C).

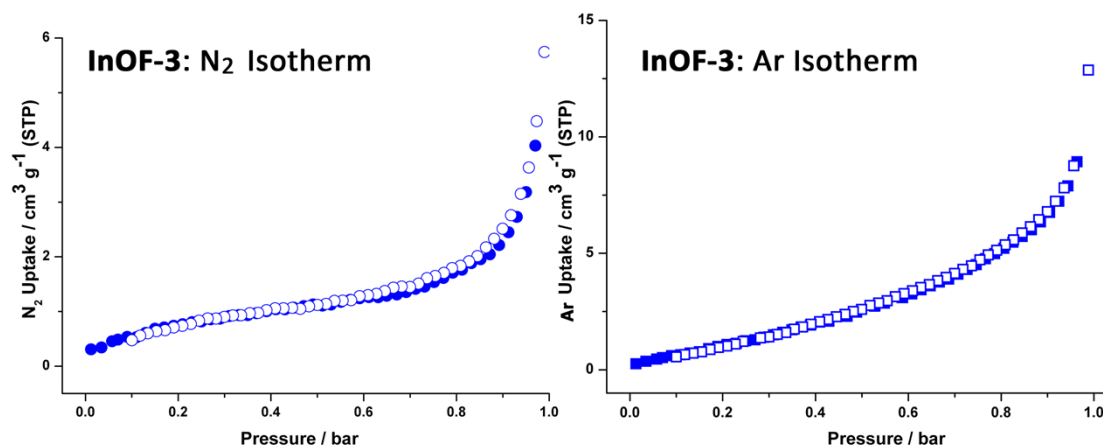

**Figure S13.** N<sub>2</sub> and Ar isotherms at 77 K for **InOF-3** samples activated at 60 °C.

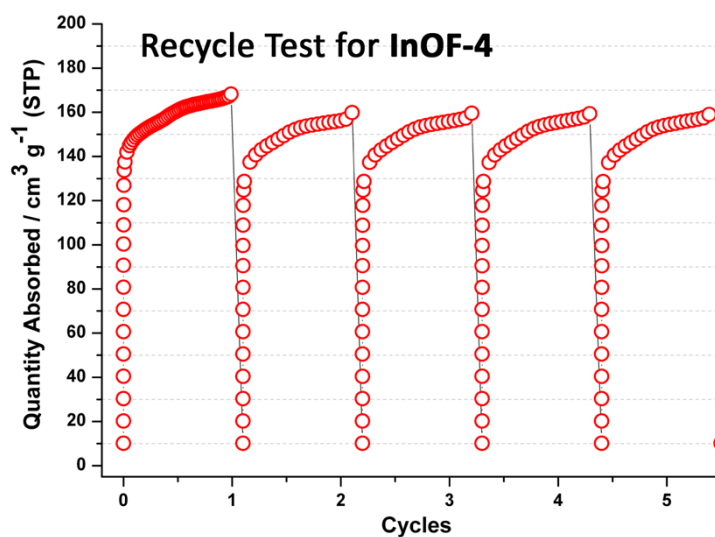

**Figure S14.** Cycling of N<sub>2</sub> uptake for the activated **InOF-4** sample at 77 K without reactivation process between cycles.

## S6. References.

- [S1] O. V. Dolomanov, L. J. Bourhis, R. J. Gildea, J. A. K. Howard and H. Puschmann, *J. Appl. Cryst.* **2009**, *42*, 339.
- [S2] SHELXS, G.M. Sheldrick, *Acta Cryst.* **2008**, *A64*, 112.
- [S3] SHELXL, G.M. Sheldrick, *Acta Cryst.* **2008**, *A64*, 112.
- [S4] (a) A. L. Spek, *J. Appl. Crystallogr.* **2003**, *36*, 7; (b) P. v.d. Sluis and A. L. Spek, *Acta Crystallogr., Sect. A*, **1990**, *46*, 194.
